# Supplementary material for: Nanocellulose supported hierarchical structured polyaniline/nanocarbon nanocomposite electrode via layer-by-layer assembly for green flexible supercapacitors
Source: PubMed Central journal article supplement — RSC Adv. 2019 Jun 6;9(31):17824–34. doi: 10.1039/c9ra02449b (PMC9064629; doi:10.1039/c9ra02449b), 2019-06-06
Supplement: RA-009-C9RA02449B-s001.pdf [file RA-009-C9RA02449B-s001.pdf]

## Supporting Information

### Nanocellulose supported hierarchical structured polyaniline/nanocarbon nanocomposite electrode via layer-by-layer assembly for green flexible supercapacitors

Shaoyi Lyu,<sup>a\*</sup> Yanping Chen,<sup>ab</sup> Longfei Zhang,<sup>ac</sup> Shenjie Han,<sup>a</sup> Yun Lu,<sup>a</sup> Yuan Chen,<sup>a</sup> Na  
Yang,<sup>a</sup> Zhilin Chen,<sup>a</sup> and Siqun Wang<sup>ca\*</sup>

<sup>a</sup> Research Institute of Wood Industry, Chinese Academy of Forestry, Hunan Collaborative Innovation  
Center for Effective Utilizing of Wood & Bamboo Resources, Beijing 100091, China.

<sup>b</sup> Beijing Engineering Research Center of Cellulose and Its Derivatives, School of Materials Science and  
Engineering, Beijing Institute of Technology, Beijing 100081, China.

<sup>c</sup> Center for Renewable Carbon, University of Tennessee, Knoxville, Tennessee, 37996, USA.

\*Author for correspondence. Email: lvsy@caf.ac.cn (S. Lyu), swang@utk.edu (S. Wang).

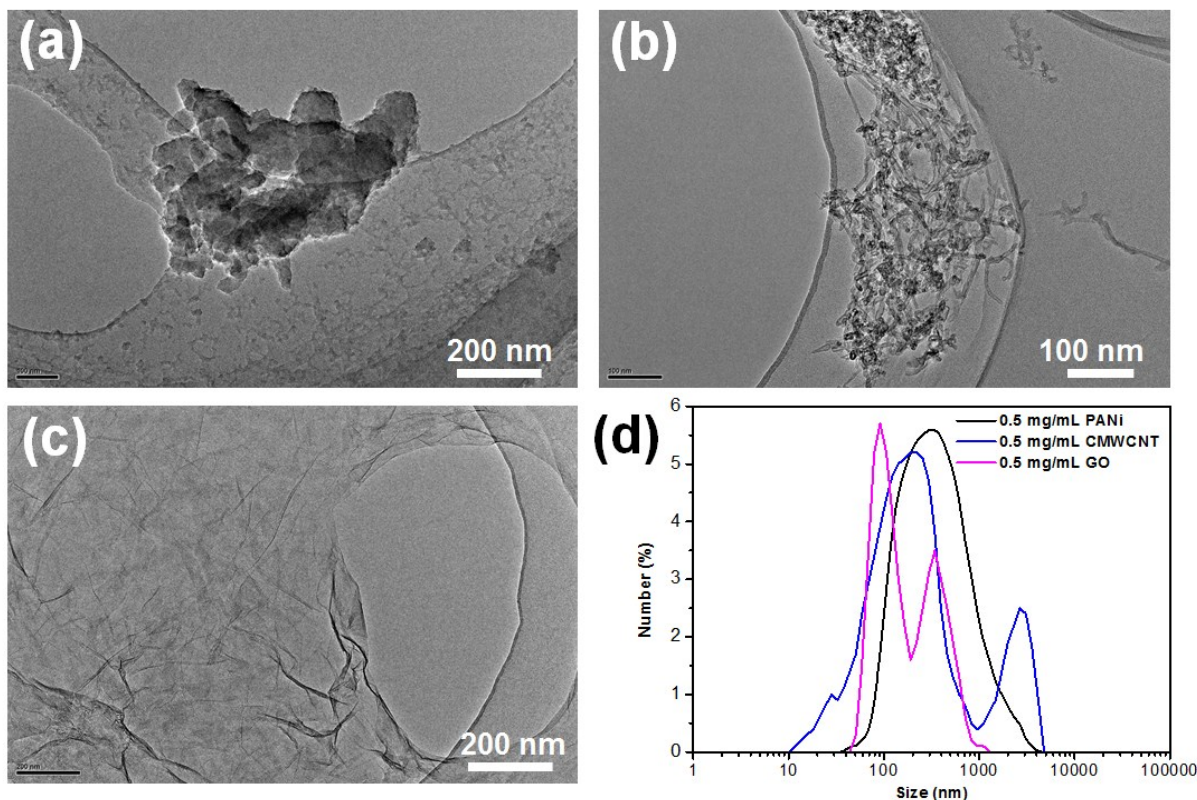

**Figure S1.** TEM images of (a) PANi, (b) CMWCNT, and (c) GO. (d) Particle-size distributions of PANi, CMWCNT, and GO.

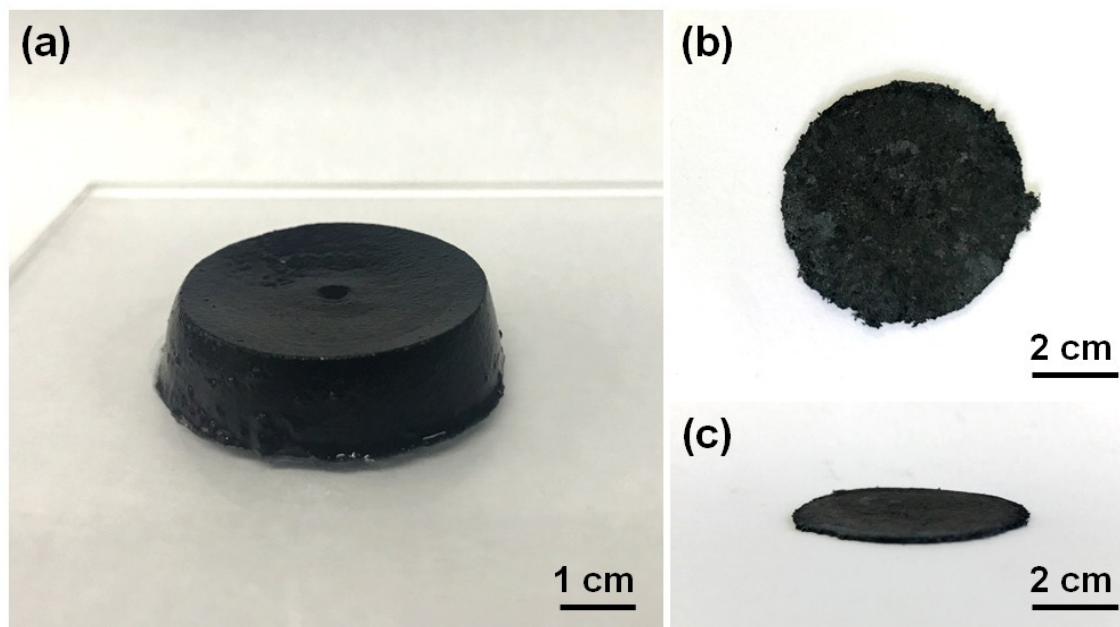

**Figure S2.** Representative photographic image of (a) hydrogels in wet state after assembly and (b, c) the compressed aerogel film.

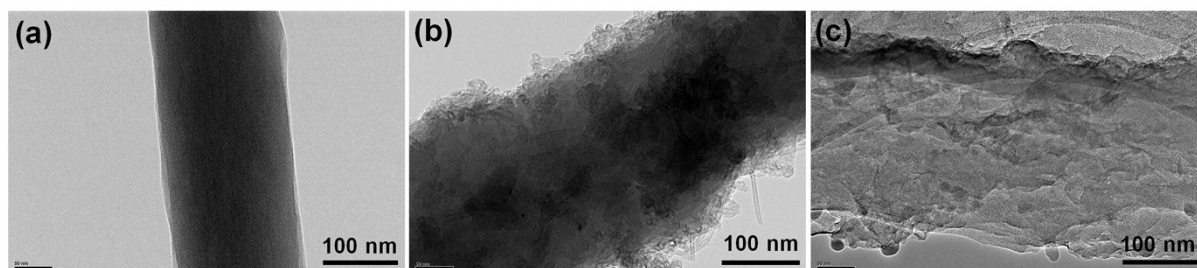

**Figure S3.** TEM images of (a) pure CNF nanofibril, (b) PC<sub>10</sub> and (c) PG<sub>10</sub> assembled on CNF nanofibril.

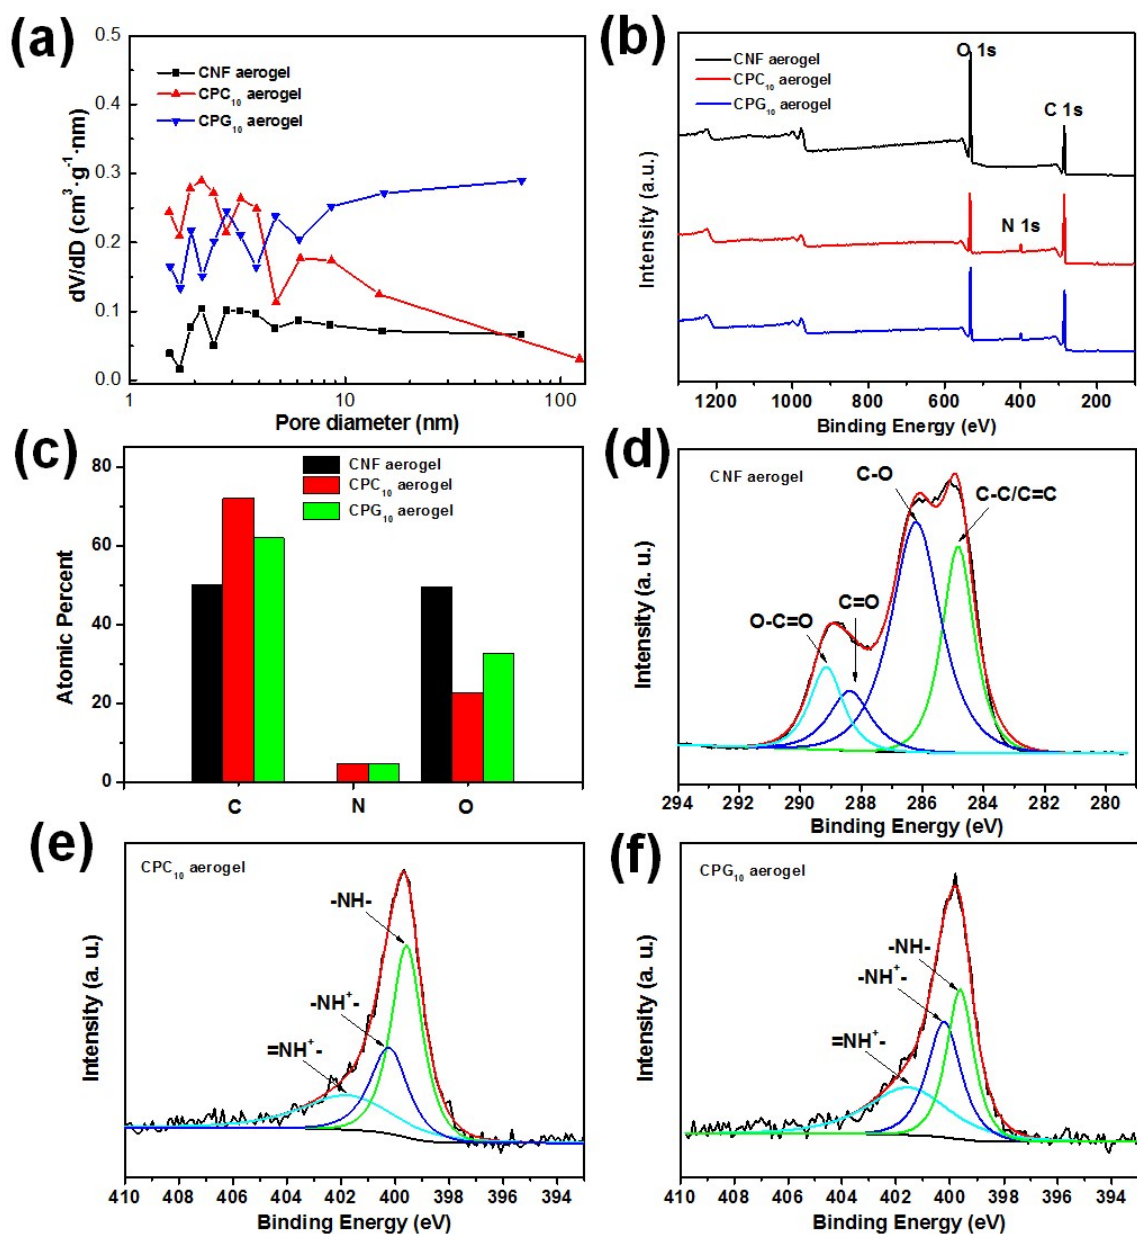

**Figure S4.** (a) Pore size distributions of the CNF, CPC<sub>10</sub>, and CPG<sub>10</sub> aerogels. (b) XPS spectra of the CNF, CPC<sub>10</sub>, and CPG<sub>10</sub> aerogels. (c) Atomic percentages in the CNF, CPC<sub>10</sub>, and CPG<sub>10</sub> aerogels. (d) High-resolution XPS C1s spectrum of the CNF aerogel, and its deconvolution. High-resolution XPS N1s spectra of the (e) CPC<sub>10</sub> aerogel and (f) CPG<sub>10</sub> aerogel, and their deconvolutions.

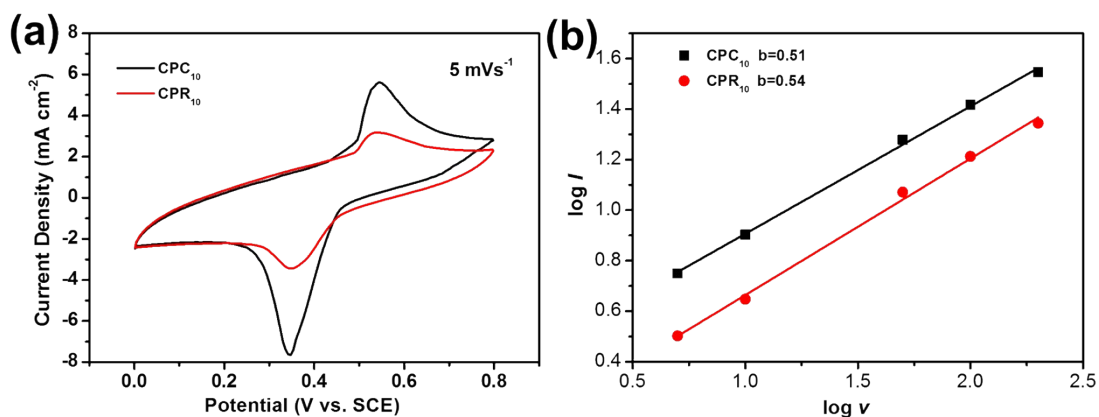

**Figure S5.** (a) CV curves for the CPC<sub>10</sub> and CPR<sub>10</sub> electrodes at a scan rate of 5 mV s<sup>-1</sup> under three-electrode testing conditions in 1 M H<sub>2</sub>SO<sub>4</sub>. (b) Graphs of log *I* vs. log *ν* for the CPC<sub>10</sub> and CPR<sub>10</sub> electrodes used to obtain *b* values.

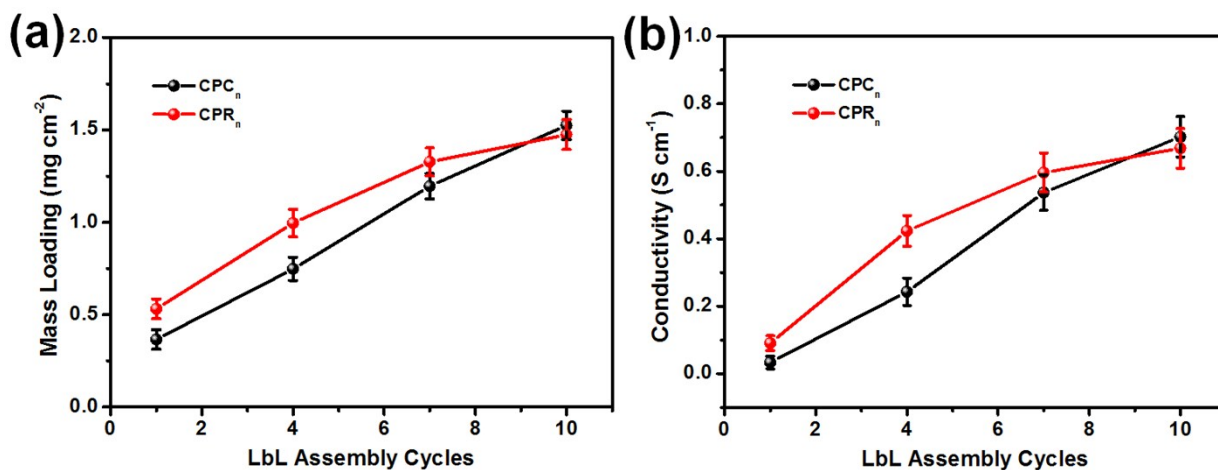

**Figure S6.** (a) Mass loadings and (b) conductivities of the CPC<sub>n</sub> and CPR<sub>n</sub> electrodes as functions of LbL assembly cycles.

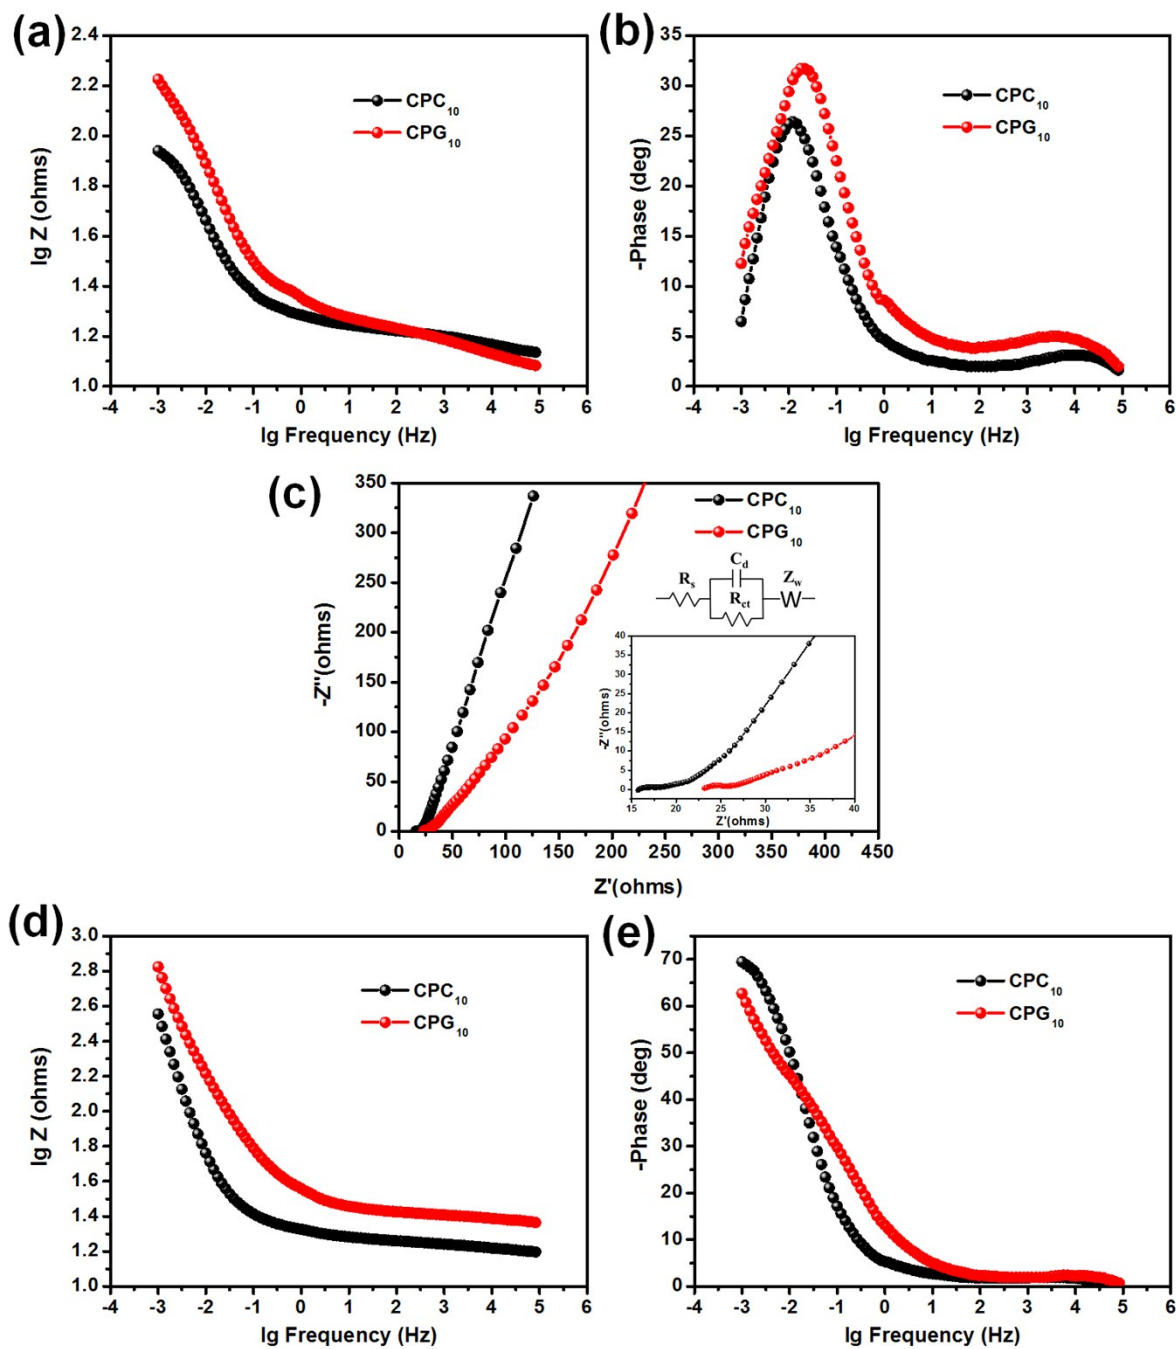

**Figure S7.** Bode plots of the (a)  $\lg Z$  and (b) phase angle versus frequency in the three-electrode test in 1 M  $\text{H}_2\text{SO}_4$ . (c) Nyquist plots for the CPC<sub>10</sub> and CPR<sub>10</sub> electrodes under two-electrode test with PVA/ $\text{H}_3\text{PO}_4$  gel electrolyte. Bode plots of the (d)  $\lg Z$  and (e) phase angle versus frequency in the two-electrode test with PVA/ $\text{H}_3\text{PO}_4$  gel electrolyte.



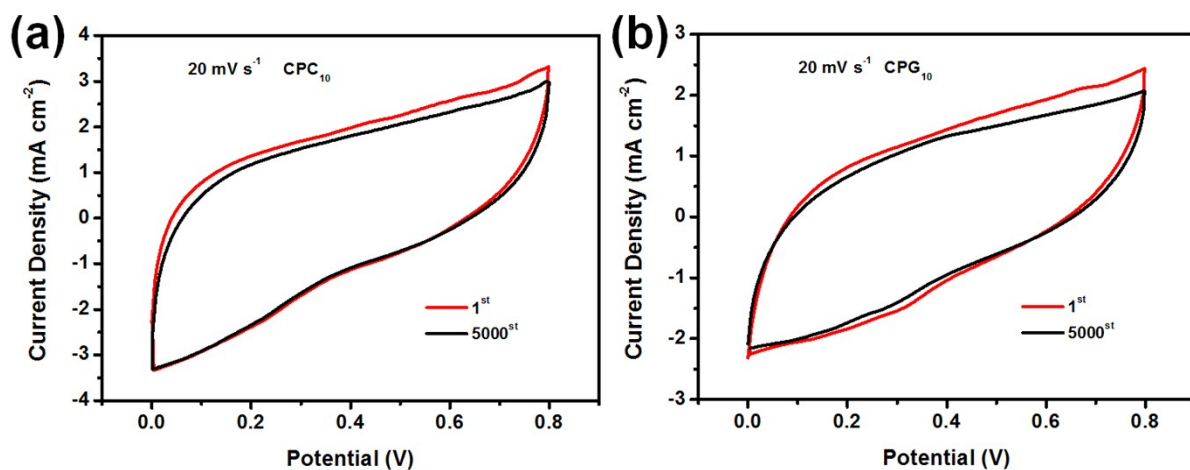

**Figure S8.** CV curves for (a) CPC<sub>10</sub> and (b) CPR<sub>10</sub> electrodes during cycle-stability testing. All data were obtained under two-electrode testing conditions with PVA/H<sub>3</sub>PO<sub>4</sub> gel electrolyte.

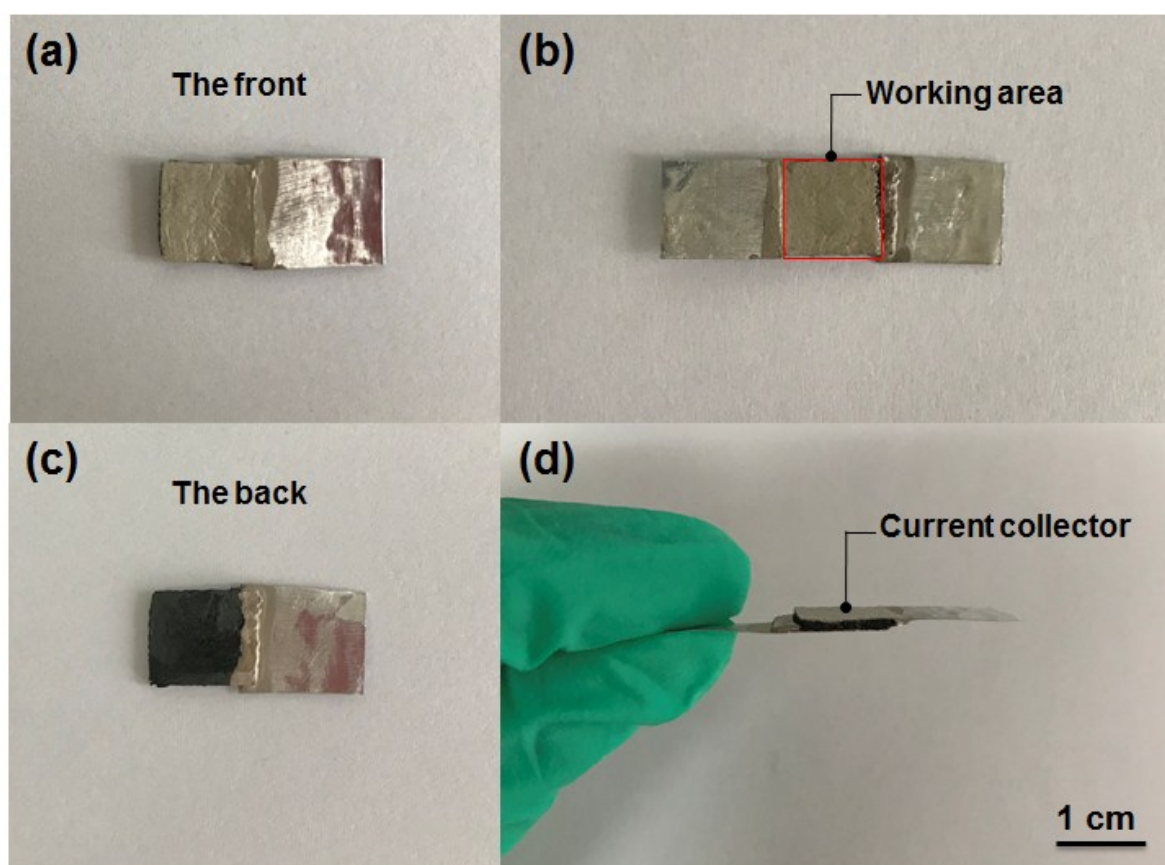

**Figure S9.** Optical images of the (a) front and the (c) back sides of electrodes. Optical images of supercapacitor device showing (b) working area and (d) current collector

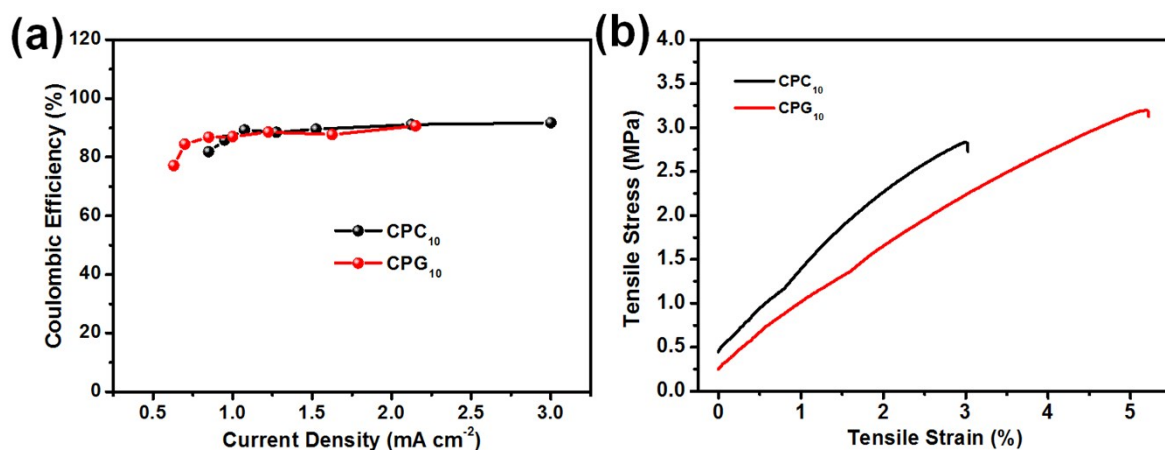

**Figure S10.** (a) Coulombic efficiency of the two assembled supercapacitors. All data were obtained under two-electrode testing conditions with PVA/ $\text{H}_3\text{PO}_4$  gel electrolyte. (b) Stress-strain curves of the CPC<sub>10</sub> and CPR<sub>10</sub> electrodes.

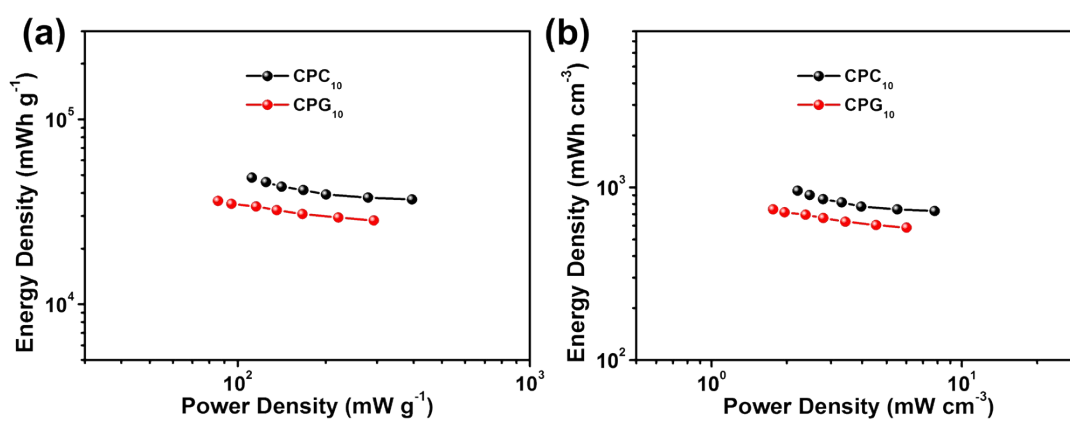

**Figure S11.** Ragone plots of power density vs. energy density for the two assembled supercapacitors calculated by the mass (a) or volume (b) of the device.
